# Supplementary material for: Short-term 3D culture systems of various complexity for treatment optimization of colorectal carcinoma
Source: PubMed Central journal article supplement (PMC6506470; doi:10.1038/s41598-019-42836-0), 2019-05-08
Supplement: 41598_2019_42836_MOESM1_ESM.pdf [file 41598_2019_42836_MOESM1_ESM.pdf]

## Supplementary Information

### **Short-term 3D culture systems of various complexity for treatment optimization of colorectal carcinoma**

Marloes Zoetemelk<sup>1,2</sup>, Magdalena Rausch<sup>1,2</sup>, Didier J. Colin<sup>3</sup>, Olivier Dormond<sup>4</sup>, Patrycja Nowak-Sliwinska<sup>1,2\*</sup>

<sup>1</sup>Molecular Pharmacology Group, School of Pharmaceutical Sciences, University of Geneva, University of Lausanne, 1211 Geneva 4, Switzerland; <sup>2</sup>Translational Research Center in Oncohaematology, 1211 Geneva 4, Switzerland; <sup>3</sup>Centre for BioMedical Imaging (CIBM), University Hospitals and University of Geneva, 1211 Geneva 4, Switzerland; <sup>4</sup>Department of Visceral Surgery, Lausanne University Hospital, Lausanne, Switzerland

**Supplementary Methods**  
**Supplementary Figures S1-S9**  
**Supplementary Tables S1-S10**  
**Supplementary Movies S1-S3**

**Supplementary Methods**

*Immunohistochemistry*

To unmask cellular targeted markers glass slides were heated in a beaker with TRIS/EDTA until boiling and continued to be heated for an additional 15 min on the defrost program after which they were left to cool. Before blocking, slides were washed with PBS and PBS supplemented with 0.2% Triton-X (PBST-X). To perform blocking, slides were covered with 80  $\mu$ L PBST-X and 1% BSA blocking buffer and incubated for 20 min at RT. Following, cells were stained overnight at 4 °C with primary antibodies, i.e. Ki67 Rabbit mAb (9027, Cell Signaling) or CleavedCaspase3 Rabbit mAb (9664, Cell Signaling). Slides were washed twice with PBST-X and once with PBS and incubated for 1 hour at RT in the dark with the secondary antibody AF488 Donkey- $\alpha$ -Rabbit (A-21206, ThermoFisher Scientific) and DAPI. Slides were washed twice with PBST-X, washed once with PBS and mounted with Dako fluorescence mounting medium (S3023, Agilent) for fluorescence imaging.

## Supplementary Figure S1

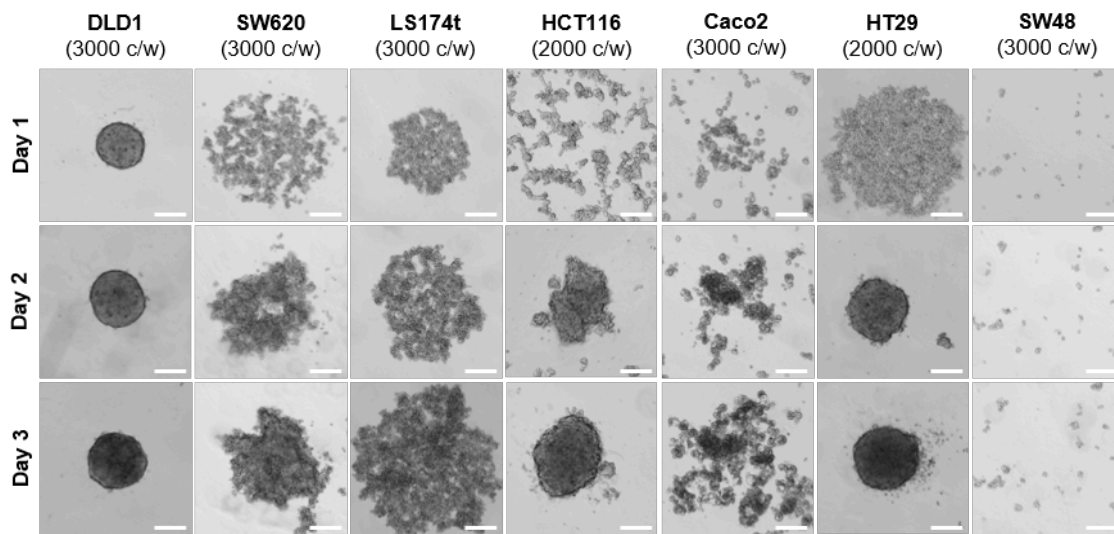

### Supplementary Figure S1. CRC spheroid kinetics and morphology.

Representative images of CRC cells seeded in low-attachment plates without 2.5% basement membrane. Seeding densities of spheroid forming cell lines DLD1, SW620 and HT29 optimized to approximately 400  $\mu\text{m}$  in diameter at day 2. Scale bar represents 200  $\mu\text{m}$ .

Supplementary Figure S2

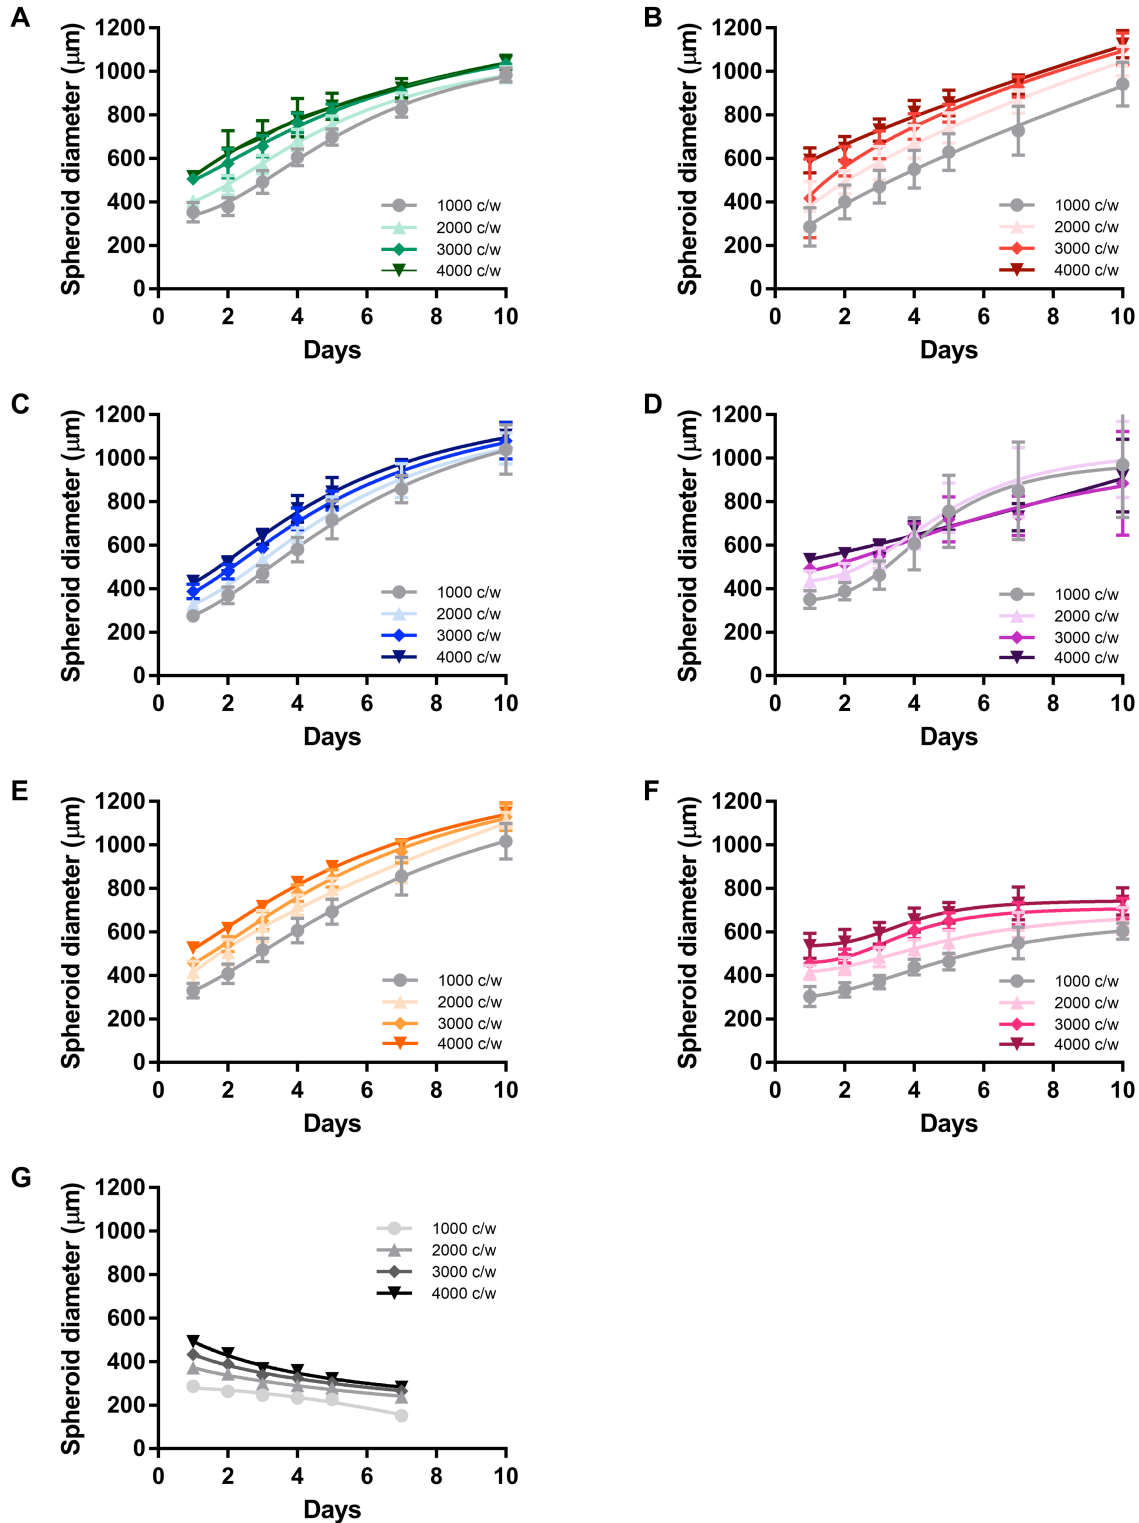

**Supplementary Figure S2. Spheroid seeding density and size change in time.**

Growth kinetics of spheroid diameter of **A** HCT116, **B** DLD1, **C** SW620, **D** HT29, **E** LS174T, **F** Caco2 and **G** CCD841 from day 1 to 10 seeded 1000-4000 c/w. Error bar represents the standard deviation of n = 3-15.

## Supplementary Figure S3

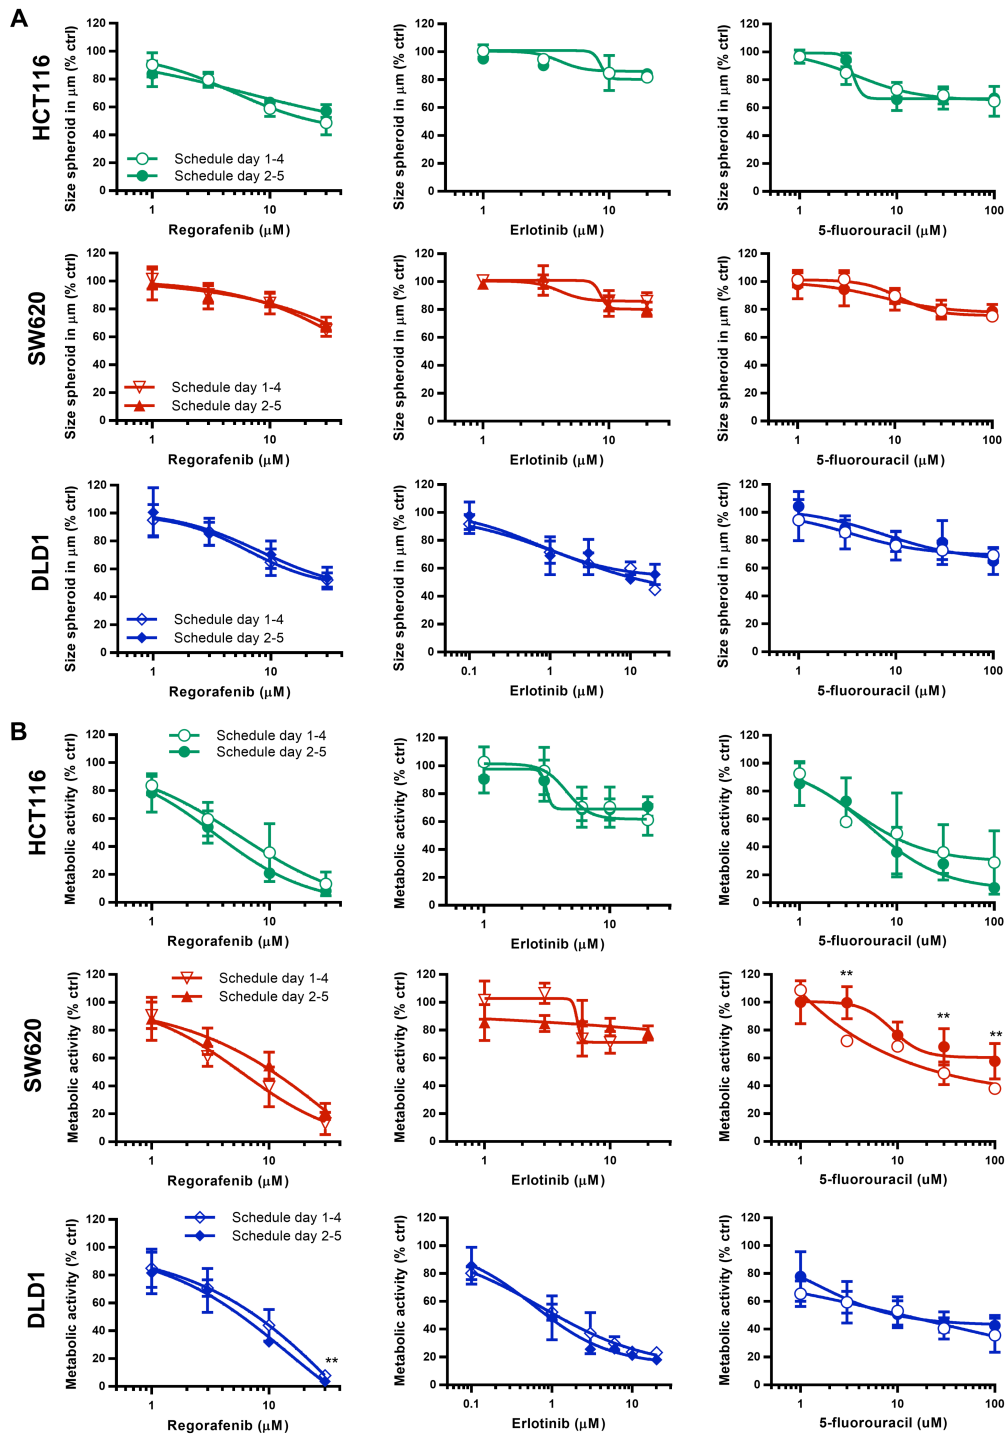

### Supplementary Figure S3. Dose-dependent regorafenib, erlotinib or 5-fluorouracil sensitivity in CRC 3D cultures.

**A** Spheroid size and **B** metabolic activity as a function of drug doses in HCT116, SW620 and DLD1 3D cultures were treated for 72 hours with dose ranges of regorafenib (1-30  $\mu\text{M}$ ), erlotinib (0.1-20  $\mu\text{M}$ ) or 5-fluorouracil (1-100  $\mu\text{M}$ ). Dose-response curves were obtained for each drug administered for 72 hours at two treatment schedules, i.e. (i) 1 day after spheroids were formed (Figure 2B, open symbols), or (ii) 2 days after spheroid formation (closed symbols). Error bars represent the standard deviation (spheroid size measurements  $n = 3-9$ ; metabolic activity measurements  $n = 6-21$ ). Significances of \* $p < 0.05$  and \*\* $p < 0.01$  define the differences for each drug concentration between the treatment schedules as determined with the unpaired multiple T-test.

## Supplementary Figure S4

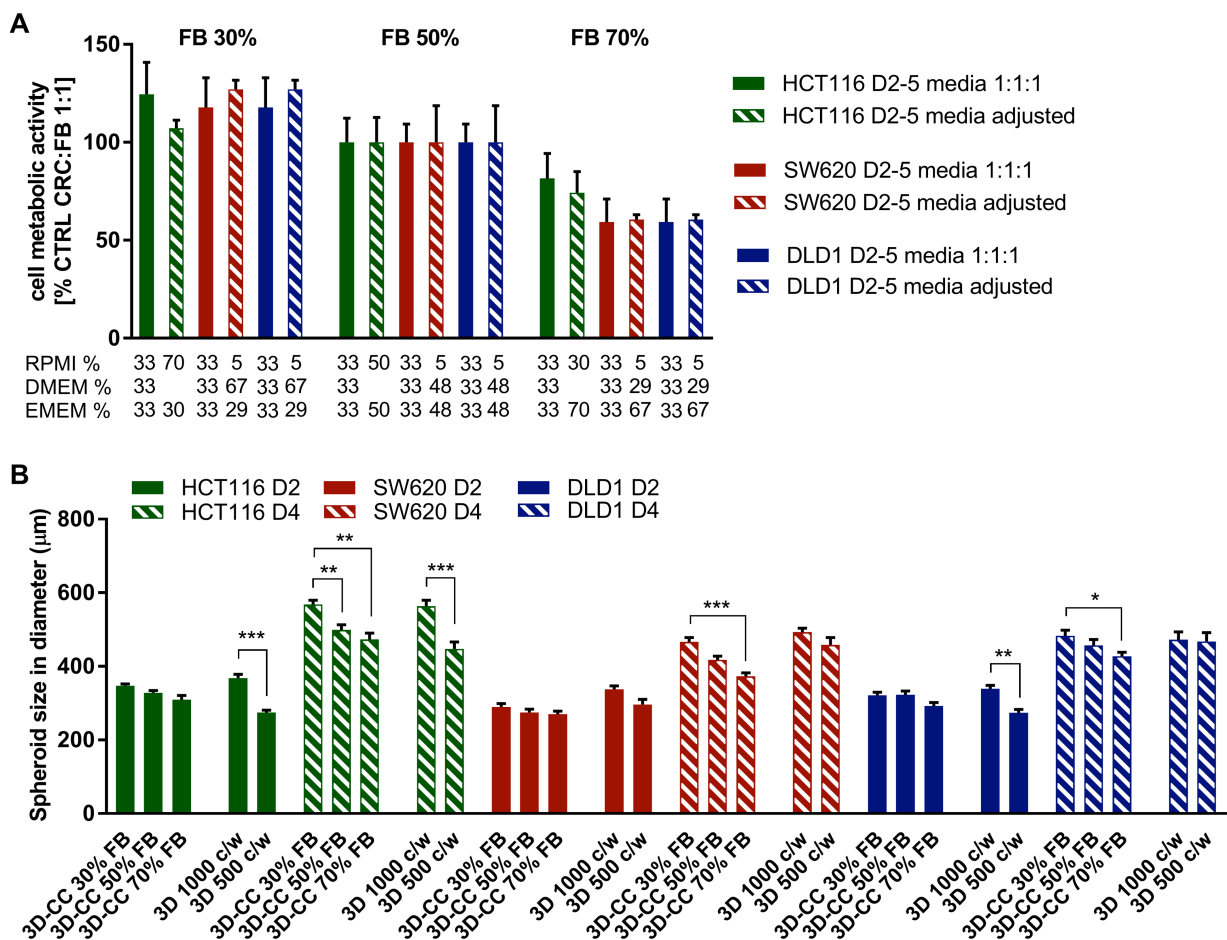

### Supplementary Figure S4. Optimization of 3D spheroid growth conditions.

**A** Metabolic activity of HCT116, SW620 and DLD1 3D co-cultures consisting of tumor cells with 30%, 50% or 70% fibroblasts and an additional 5% of endothelial cells relative to the 3D co-cultures with 50% fibroblasts at 100%, tested in various media compositions (DMEM, RPMI and/or EMEM), as indicated. Error bars represent the standard deviation of  $n = 3$ . **B** Spheroid size of HCT116, SW620 and DLD1 3D cultures at 1000 or 500 c/w and 3D co-cultures with various percentages of fibroblasts at the start of treatment at day 2 and day 5. Error bars represent the standard error of the mean of  $n = 9$ . Significances of  $*p < 0.05$ ,  $**p < 0.01$  and  $***p < 0.001$  define the differences between the CRC 3D and 3D co-culture conditions as determined with a two-way ANOVA with post-hoc Tukey's multiple comparisons test.

## Supplementary Figure S5

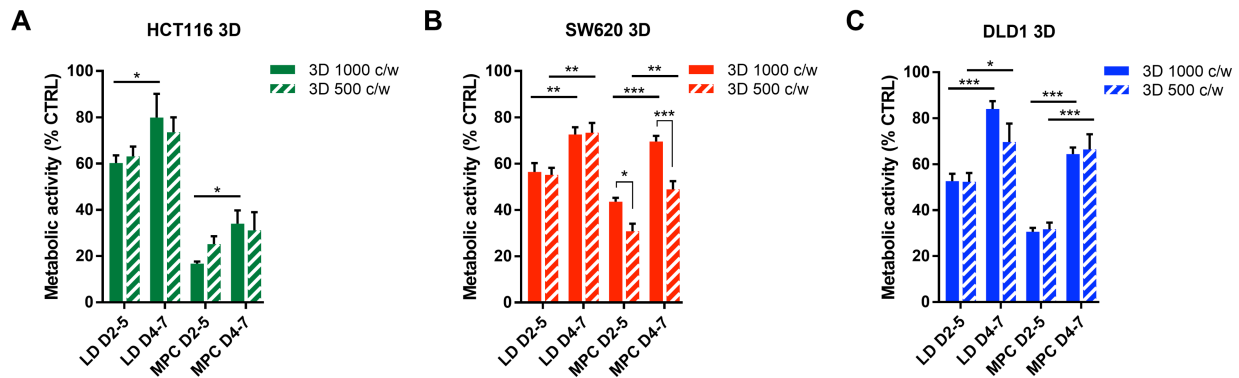

### Supplementary Figure S5. Responsiveness of 3D co-culture spheroids to different treatment schedules.

Metabolic activity of HCT116 (A), SW620 (B) and DLD1 (C) 3D cultures at 1000 or 500 c/w after treatment with the low dose (LD) and max plasma concentration (MPC) drug combinations in two treatment schedules from day 2-5 and day 4-7. Error bars represent the standard deviation of  $n = 9-12$ . Significances of \* $p < 0.05$ , \*\* $p < 0.01$  and \*\*\* $p < 0.001$  represent the comparison between the 3D cultures and treatment schedules as determined with a two-way ANOVA with post-hoc Sidak's multiple comparisons test.

**Supplementary Figure S6**

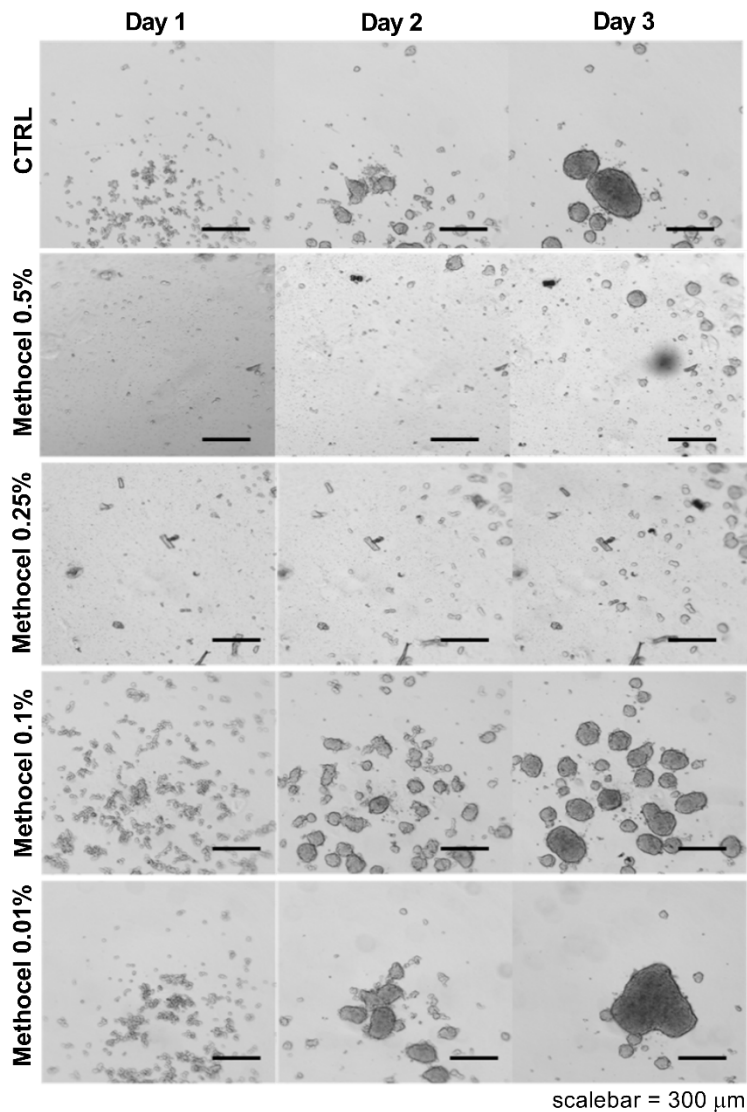

**Supplementary Figure S6. HCT116 spheroid formation with methylcellulose supplement.**

Representative images of CRC cells seeded in low-attachment plates supplemented with Methocel methylcellulose at 0.01%, 0.1%, 0.25% and 0.5%. Scale bar represents 300 µm.



**Supplementary Figure S7**

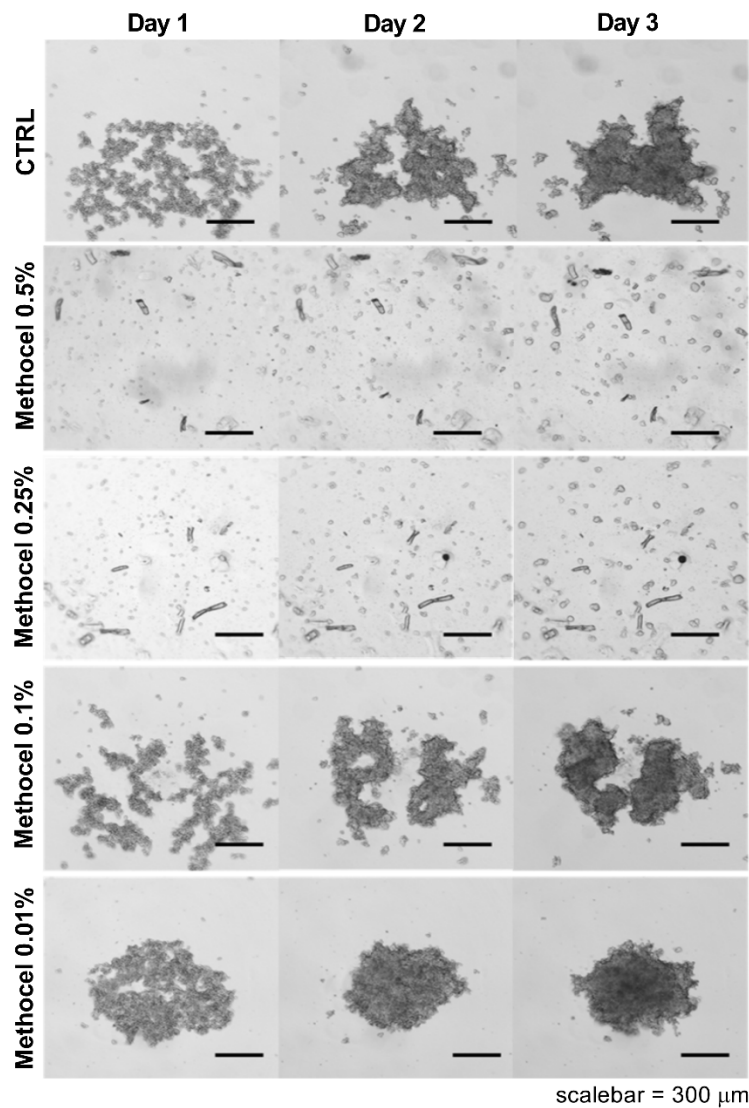

scalebar = 300 µm

**Supplementary Figure S7. SW620 spheroid formation with methylcellulose supplement.**

Representative images of CRC cells seeded in low-attachment plates supplemented with Methocel methylcellulose at 0.01%, 0.1%, 0.25% and 0.5%. Scale bar represents 300 µm.

**Supplementary Figure S8**

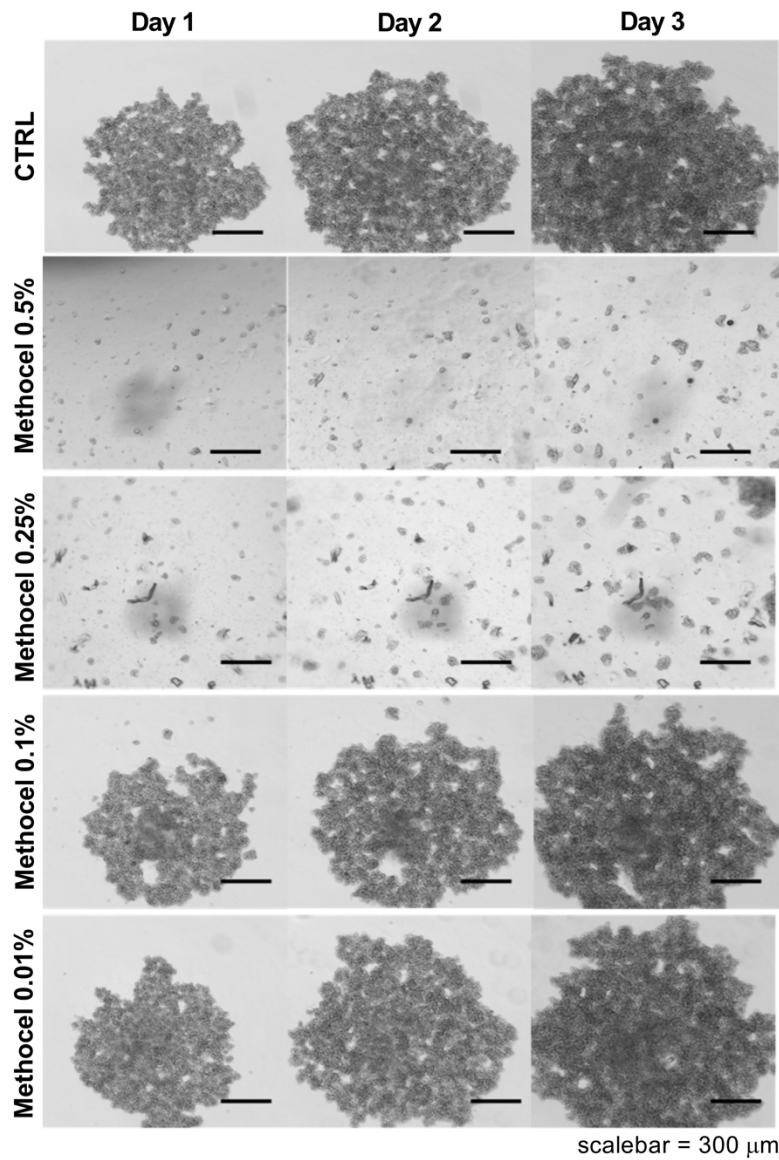

**Supplementary Figure S8. LS174T spheroid formation with methylcellulose supplement.** Representative images of CRC cells seeded in low-attachment plates supplemented with Methocel methylcellulose at 0.01%, 0.1%, 0.25% and 0.5%. Scale bar represents 300 µm.

## Supplementary Figure S9

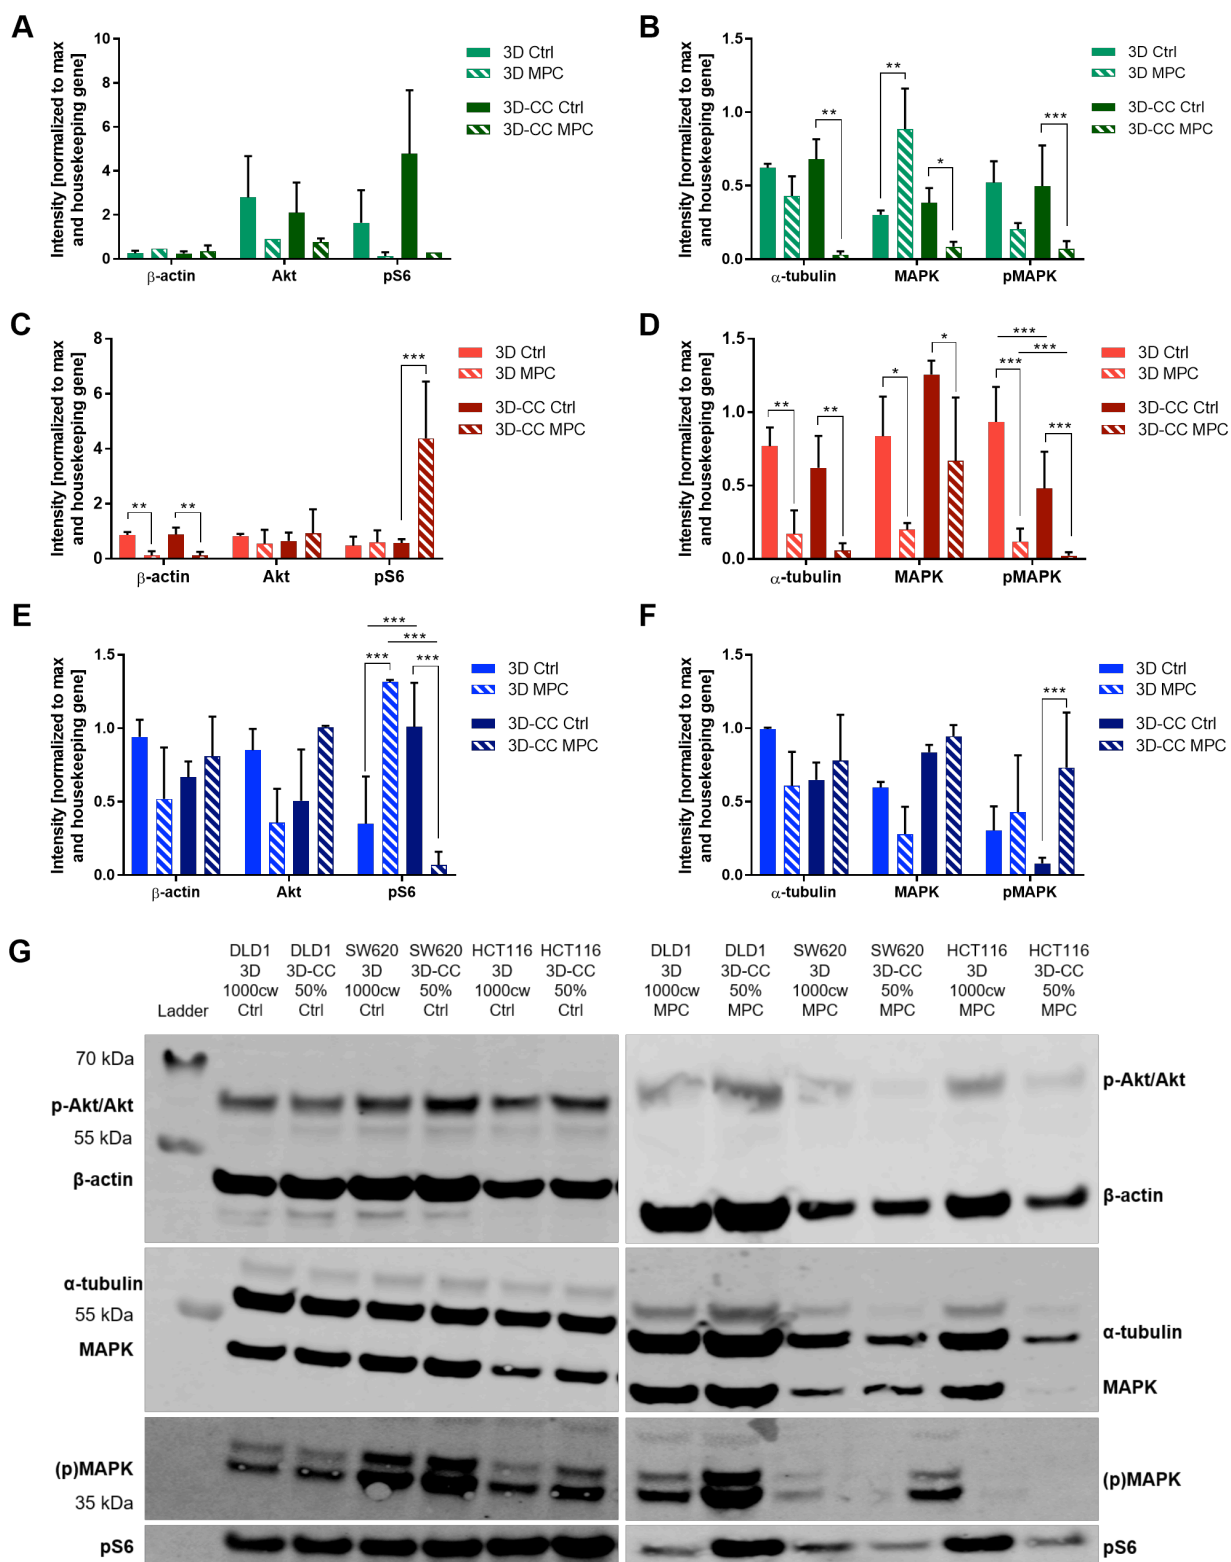

### Supplementary Figure S9. PI3K-AKT-mTOR and RAS-RAF-MAPK signaling in 3D and 3D co-cultures for three CRC cell lines.

Western blot analysis of various proteins and phosphorylated (p-) proteins in the PI3K-AKT-mTOR and RAS-RAF-MAPK pathway of HCT116, SW620 and DLD1 3D cultures (seeded 1000 c/w) and 3D co-cultures (3D-CC, seeded with 50% fibroblasts). Cultures were treated with a 3-drug combination at maximum plasma concentration (MPC) or with CTRL. Analysis of **A,C,E** β-actin, Akt and p-rpS6 (S235/236), and **B,D,F** α-tubulin, MAPK and p-MAPK (T202/Y204) in HCT116 (green), SW620 (red) and DLD1 (blue), respectively. Alfa (α)-tubulin and beta (β)-actin were used as loading

controls. The error bars represent the standard deviation over the mean. Significances of \* $p < 0.05$ , \*\* $p < 0.01$ , \*\*\* $p < 0.001$  were determined with a two-way Anova test with post-hoc Tukey's multiple comparison.

### Supplementary Figure S10

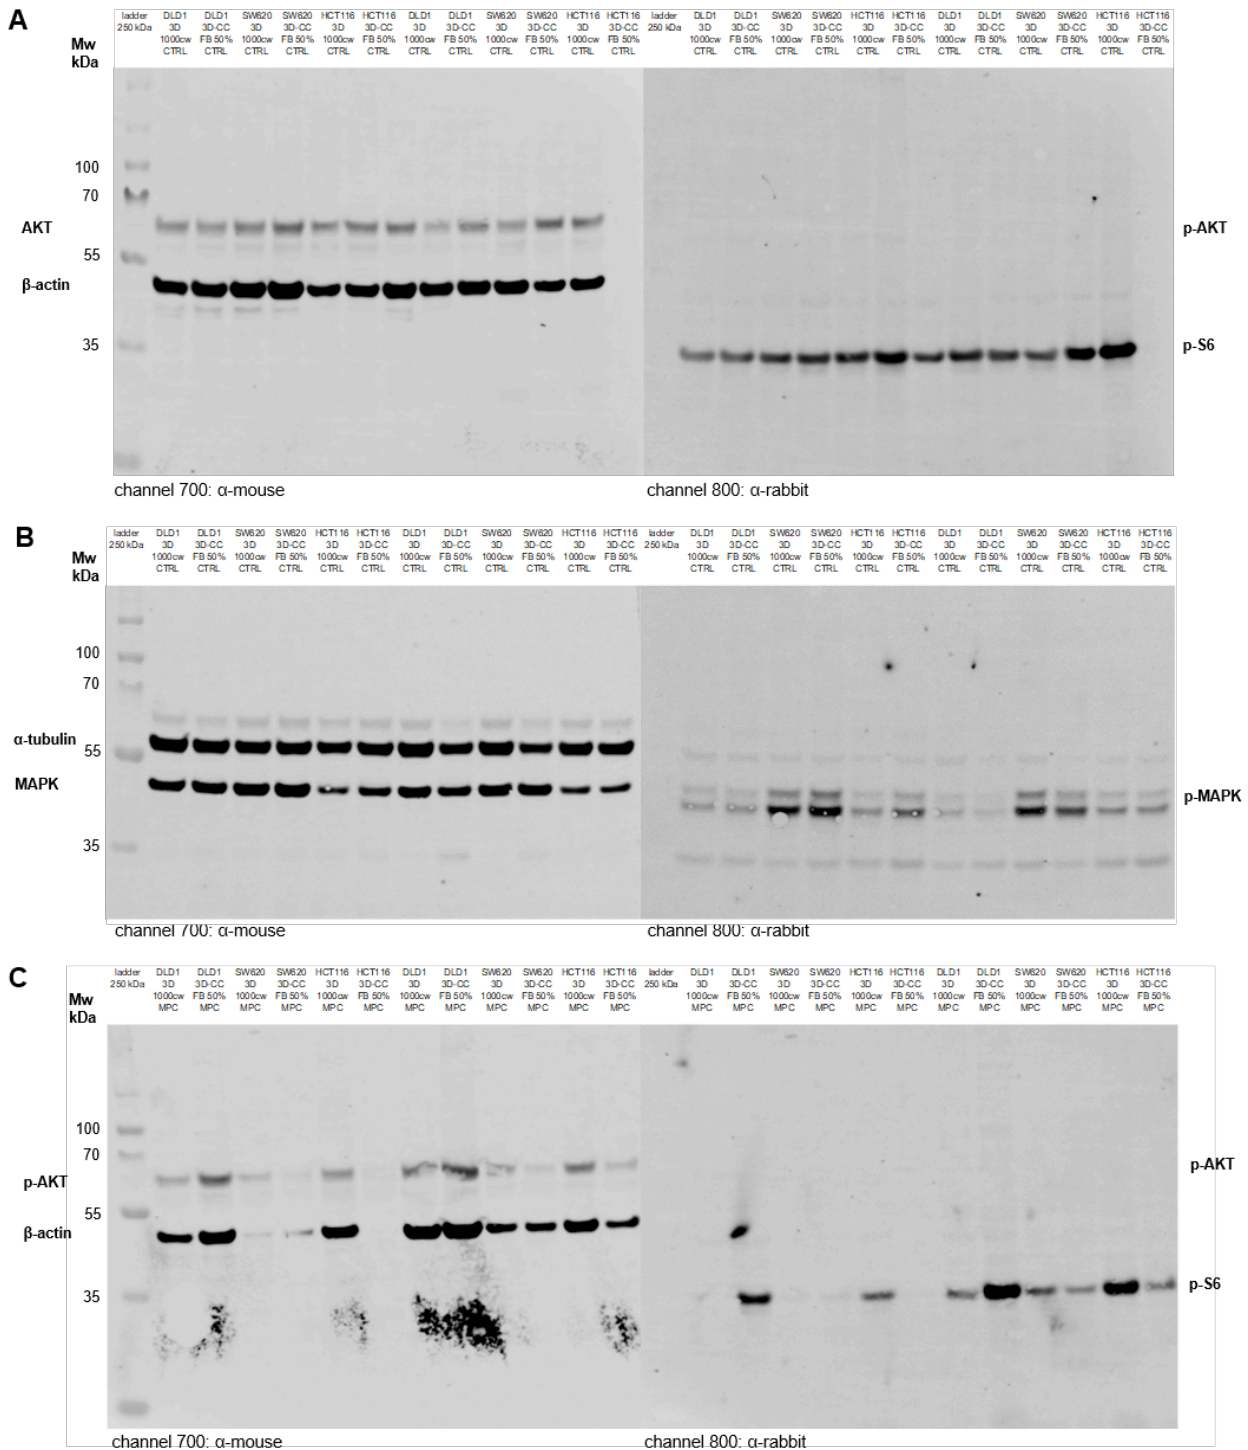

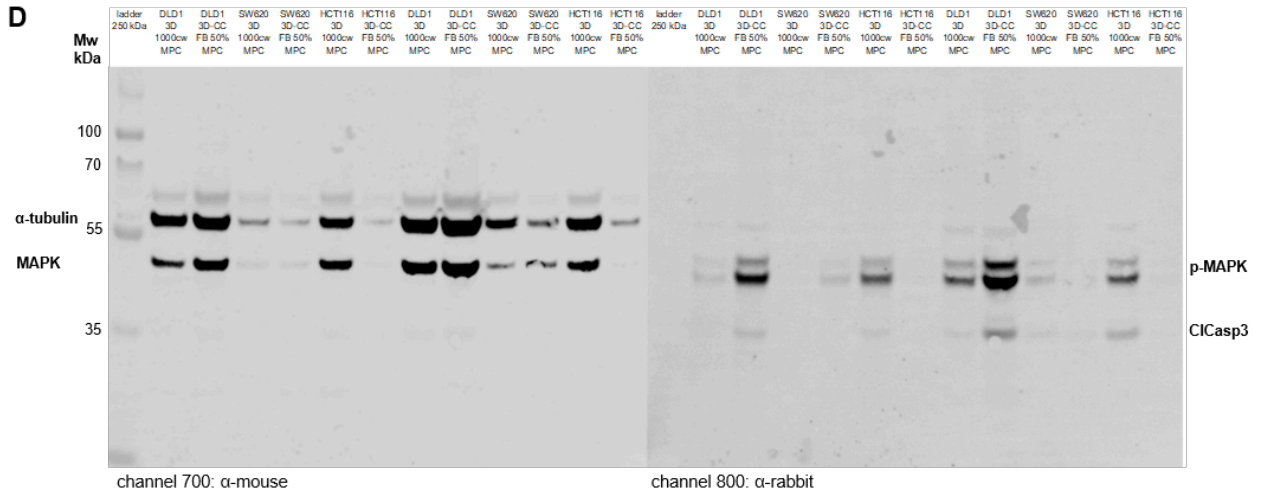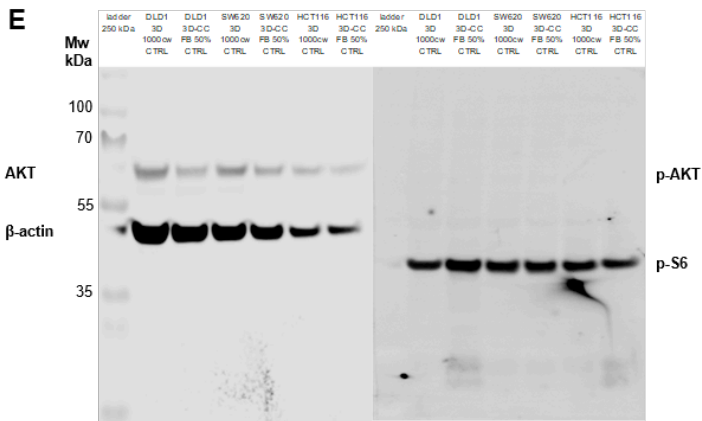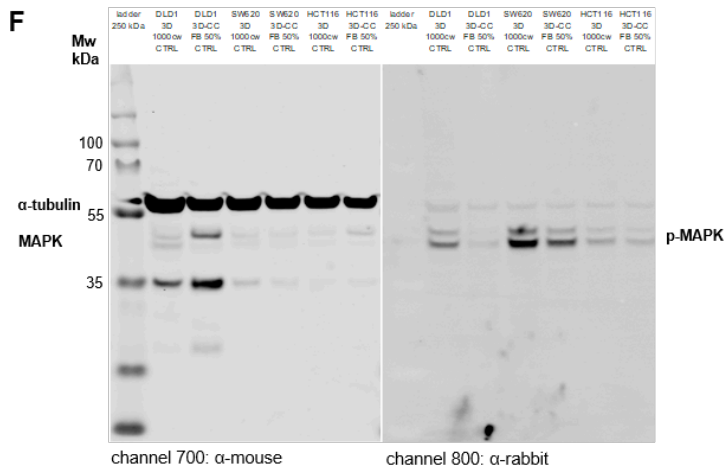

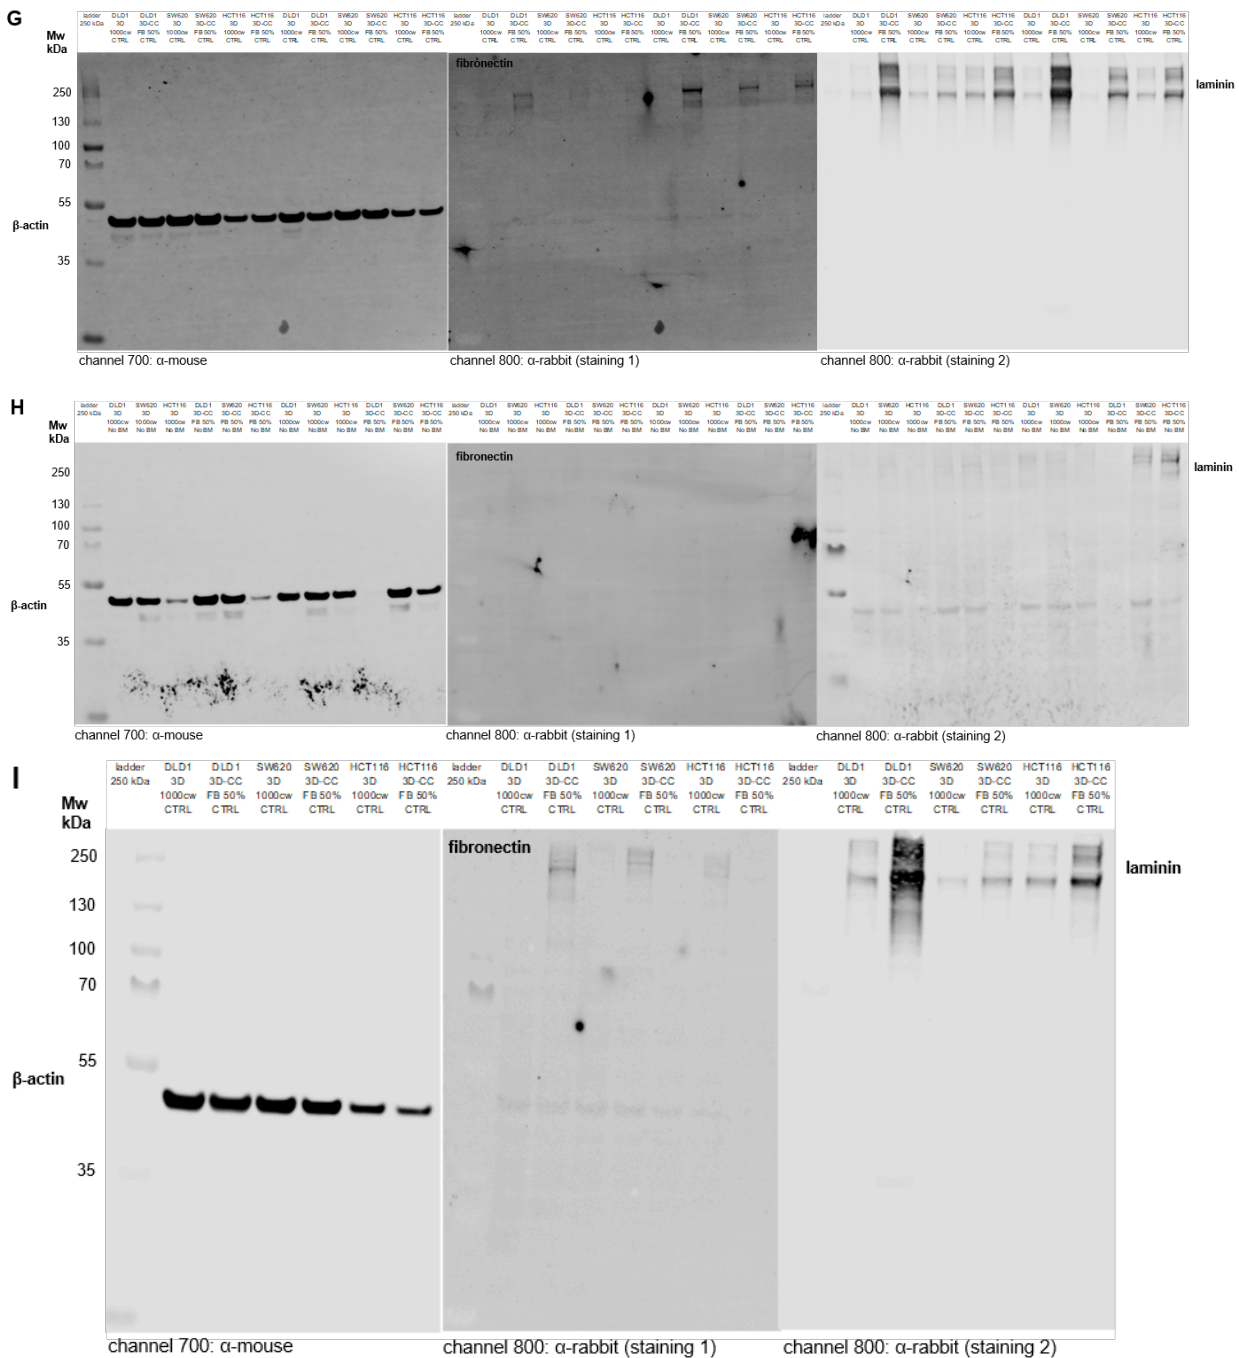

**Supplementary Figure S10. Full length unprocessed western blot results of PI3K-AKT-mTOR and RAS-RAF-MAPK signaling and extracellular matrix in 3D and 3D co-cultures for three CRC cell lines.**

Western blot analysis of various proteins and phosphorylated (p-) proteins in the PI3K-AKT-mTOR and RAS-RAF-MAPK pathway of HCT116, SW620 and DLD1 3D cultures (seeded 1000 c/w) and 3D co-cultures (3D-CC, seeded with 50% fibroblasts). Cultures were treated with a 3-drug combination at maximum plasma concentration (MPC) or with CTRL. **A,C,E** Western blots for  $\beta$ -actin (45 kDa), Akt (60 kDa) and p-rpS6 (S235/236, 32 kDa). **B,D,F** Western blots for  $\alpha$ -tubulin (52 kDa), MAPK and p-MAPK (T202/Y204, 42 and 44 kDa) proteins. **G,H,I** Western blots for  $\beta$ -actin (45 kDa), fibronectin (285 kDa) and laminin (210 and 400 kDa) proteins. Cropped parts of the gels are presented in Figure 7. The blots images were prepared in compliance with the digital image and integrity policies of the journal. Images were obtained with the Licor Odyssey CLx scanner at one default exposure setting.

## Supplementary Tables

**Supplementary Table S1. Morphological characteristics of the 3D cultures**

| <i>Cell line</i> | <i>Morphology observed as of day two</i>                                                                                                                |
|------------------|---------------------------------------------------------------------------------------------------------------------------------------------------------|
| DLD1             | Circular, compact core and defined periphery<br>Over time evolves into heterogeneous and lobular shapes                                                 |
| SW620            | Spherical, clear and uncompact, no defined periphery<br>Over time increased compactness of the core                                                     |
| HCT116           | Circular, compact core and fully defined periphery<br>Over time increased compactness of the core with loose cells surrounding the clearly defined rim  |
| LS174T           | Spherical form with defined periphery. Increased compactness of the core over time and increased definition of the periphery in slightly lobular shapes |
| HT29             | Circular, compact core and defined periphery. Spheroid disintegration starting at day five                                                              |
| Caco2            | Round, loose with varying shapes and defined periphery.<br>Over time increased compactness of the core                                                  |
| CCD841<br>CoN    | Circular, clear and uncompact with aligned periphery at day one.<br>From day 2 decreased size and compactness with cells sprouting at the periphery     |

\* Circularity: the closer to a circularity of 1, the more symmetrical the spheroid.

**Supplementary Table S2.** Primary and secondary antibodies

| <b>Primary Ab</b>                        | <b>Source</b>     | <b>Cat#</b> | <b>Dilution</b> | <b>Host</b> |
|------------------------------------------|-------------------|-------------|-----------------|-------------|
| Akt pan                                  | Cell Signaling    | 9272        | 750x            | Rabbit      |
| p- Akt (S473)                            | Cell Signaling    | 4060        | 300x            | Rabbit      |
| ERK1/2                                   | Cell Signaling    | 4696        | 1000x           | Mouse       |
| p- ERK1/2 (T202/Y204)                    | Cell Signaling    | 9101        | 750x            | Rabbit      |
| p- rpS6 (S235/236)                       | Spring Bioscience | M3052       | 2000x           | Rabbit      |
| laminin                                  | Abcam             | ab11575     | 1000x           | Rabbit      |
| fibronectin                              | Abcam             | AB2413      | 1000x           | Rabbit      |
| alfa-tubulin                             | Cell Signaling    | 3873S       | 1000x           | Mouse       |
| actin                                    | Sigma             | A2228       | 2000x           | Mouse       |
| <b>Secondary Ab</b>                      | <b>Source</b>     | <b>Cat#</b> | <b>Dilution</b> | <b>Host</b> |
| Alexa Fluor® 680 goat anti- <b>Mouse</b> | Thermofisher      | A21058      | 4000x           | Mouse       |
| IRDye 800 sheep anti- <b>Rabbit</b>      | Rockland          | 611-632-122 | 4000x           | Rabbit      |



**Supplementary Table S3. EC<sub>50</sub>, low dose (LD) and maximal plasma concentration (MPC) for regorafenib, erlotinib and 5-fluorouracil administered in HCT116, SW620 and DLD1 cells for 72 hours**

|               |    | <i>regorafenib (μM)</i> |           |                | <i>erlotinib (μM)</i>  |           |            | <i>5-fluorouracil (μM)</i> |           |                |
|---------------|----|-------------------------|-----------|----------------|------------------------|-----------|------------|----------------------------|-----------|----------------|
|               |    | <i>EC<sub>50</sub></i>  | <i>LD</i> | <i>MPC(78)</i> | <i>EC<sub>50</sub></i> | <i>LD</i> | <i>MPC</i> | <i>EC<sub>50</sub></i>     | <i>LD</i> | <i>MPC(79)</i> |
| <b>HCT116</b> | 2D | >100                    | 0.8       | 4.0            | 12.3                   | 1.6       | 1.6        | 4.5                        | 3.0       | 10.0           |
|               | 3D | 3.3                     | 1.0       | 4.0            | 5.5                    | 1.6       | 1.6        | 6.9                        | 1.0       | 10.0           |
| <b>SW620</b>  | 2D | 5.7                     | 3.0       | 4.0            | 10.1                   | 1.6       | 1.6        | 8.0                        | 3.0       | 10.0           |
|               | 3D | 6.8                     | 1.0       | 4.0            | nc                     | 1.6       | 1.6        | 9.2                        | 3.0       | 10.0           |
| <b>DLD1</b>   | 2D | 7.6                     | 2.0       | 4.0            | 14.9                   | 1.6       | 1.6        | 5.3                        | 3.0       | 10.0           |
|               | 3D | 14.8                    | 2.0       | 4.0            | 0.6                    | 0.1       | 1.6        | 1.4                        | 1.0       | 10.0           |

Note that if the EC<sub>20</sub> was not below the MPC, the MPC was used in the LD combinations as well. EC<sub>50</sub>: effective concentration inhibiting 50% of the cells, determined using a four-parameter non-linear fit for each drug; MPC: maximal plasma concentration of the drug in patients after clinical treatment; LD: low dose of each drug with approximately 20% activity; conc: concentration; nc: the non-linear dose response curve was not converged.

**Supplementary Table S4. Drug combination activity in HCT116, SW620 or DLD1 in 2D and 3D cell (co-)cultures**

| Treatment             |              | LD   |      |      |      |      | MPC  |      |      |      | 100 $\mu$ M |      |      |
|-----------------------|--------------|------|------|------|------|------|------|------|------|------|-------------|------|------|
|                       |              | 1x   |      | 2x*  |      |      | 1x   |      | 2x*  |      | 1x          | 2x*  |      |
| <i>regorafenib</i>    |              | +    | +    | +    | +    | +    | +    | +    | +    | +    |             |      |      |
| <i>erlotinib</i>      |              | +    |      | +    | +    | +    | +    |      | +    | +    |             |      |      |
| <i>5-flourouracil</i> |              |      | +    | +    | +    | +    |      | +    | +    | +    | +           | +    |      |
| HCT116                | <b>2D</b>    | 78.6 | 63.3 | 71.9 | 58.0 |      | 51.5 | 32.0 | 34.0 | 27.6 |             | 28.3 |      |
|                       | SEM          | 1.9  | 1.9  | 2.9  | 2.6  |      | 3.3  | 2.2  | 3.4  | 2.8  |             | 6.1  |      |
|                       | CI           | 0.66 | 0.75 | 0.87 | 0.67 |      | 0.54 | 0.83 | 0.74 | 0.72 |             |      |      |
|                       | <b>3D</b>    | 79.0 | 60.3 | 84.6 | 65.3 | 43.9 | 38.5 | 20.0 | 32.7 | 19.3 | 9.2         | 11.7 | 9.6  |
|                       | SEM          | 3.8  | 4.9  | 5.2  | 5.7  | 2.4  | 2.9  | 1.6  | 1.4  | 1.1  | 0.7         | 1.0  | 0.5  |
|                       | CI           | 1.13 | 0.61 | 0.61 | 0.9  |      | 0.5  | 0.26 | 0.38 | 0.25 |             |      |      |
|                       | <b>3D-CC</b> |      |      |      | 61.2 | 41.6 |      |      |      | 9.2  | 10.5        | 10.0 | 7.4  |
|                       | SEM          |      |      |      | 5.7  | 5.4  |      |      |      | 1.7  | 1.3         | 0.7  | 0.8  |
|                       | CI           |      |      |      | 0.80 |      |      |      |      | 1.50 |             |      |      |
| SW620                 | <b>2D</b>    | 75.1 | 69.8 | 84.7 | 63.3 |      | 66.8 | 48.2 | 54.9 | 40.0 |             | 31.7 |      |
|                       | SEM          | 1.8  | 1.8  | 1.1  | 0.5  |      | 2.3  | 2.3  | 3.1  | 2.1  |             | 0.6  |      |
|                       | CI           | 0.82 | 0.91 | 0.76 | 0.80 |      | 1.22 | 1.22 | 1.32 | 1.15 |             |      |      |
|                       | <b>3D</b>    | 72.3 | 48.5 | 60.0 | 43.6 | 21.5 | 62.6 | 41.5 | 68.5 | 44.2 | 18.8        | 47.3 | 35.2 |
|                       | SEM          | 4.8  | 3.4  | 4.0  | 5.2  | 5.0  | 3.9  | 2.8  | 1.7  | 2.6  | 0.7         | 2.4  | 2.7  |
|                       | CI           | 0.37 | 0.22 | 0.20 | 0.20 |      | 0.61 | 0.94 | 0.98 | 0.72 |             |      |      |
|                       | <b>3D-CC</b> |      |      |      | 57.1 | 18.7 |      |      |      | 47.9 | 23.2        | 34.1 | 19.4 |
|                       | SEM          |      |      |      | 5.9  | 4.2  |      |      |      | 2.7  |             | 2.7  | 1.2  |
|                       | CI           |      |      |      | 0.43 |      |      |      |      | 0.98 | 2.1         |      |      |
| DLD1                  | <b>2D</b>    | 60.8 | 47.6 | 49.3 | 37.0 |      | 45.6 | 35.8 | 46.5 | 32.8 |             | 27.5 |      |
|                       | SEM          | 2.4  | 2.1  | 2.9  | 2.9  |      | 3.6  | 3.0  | 2.5  | 1.6  |             | 4.1  |      |
|                       | CI           | 0.81 | 0.33 | 0.33 | 0.47 |      | 0.87 | 0.91 | 0.73 | 0.86 |             |      |      |
|                       | <b>3D</b>    | 71.1 | 73.1 | 71.0 | 48.8 | 40.7 | 35.2 | 48.2 | 41.5 | 28.8 | 20.3        | 43.7 | 28.0 |
|                       | SEM          | 2.7  | 2.6  | 3.1  | 3.0  |      | 2.2  | 1.4  | 1.5  | 1.9  | 2.8         | 2.1  | 3.0  |
|                       | CI           | 0.78 | 1.08 | 0.47 | 0.49 | 5.9  | 0.68 | 1.49 | 0.67 | 0.75 |             |      |      |
|                       | <b>3D-CC</b> |      |      |      | 57.3 | 49.5 |      |      |      | 35.8 | 17.7        | 26.1 | 13.4 |
|                       | SEM          |      |      |      | 5.6  | 7.1  |      |      |      | 1.7  | 1.2         | 6.8  | 0.6  |
|                       | CI           |      |      |      | 0.72 |      |      |      |      | 2.00 |             |      |      |

\* Treatment of 3D (co-)cultures performed on day 2 and day 5 post spheroid formation. LD: low dose concentrations; MPC, maximal plasma concentrations clinically attained after treatment – see Figure 5 for exact drug doses; SEM: standard error of the mean; CI: combination index.

**Supplementary Table S5. Calculation of intra- and interplate deviations of cell metabolic activity of HCT116 3D co-cultures with a composition of tumor:fibroblast of 50%:50%.**

| HCT116 3D co-cultures metabolic activity (raw data) |                  |             |         |          |         |
|-----------------------------------------------------|------------------|-------------|---------|----------|---------|
| tumor:fibroblast 50:50                              |                  |             |         |          |         |
| Exp1                                                | Ctrl             | MPC         | M1      | M2       | M3      |
| Result 1                                            | 71562            | 32919       | 19657   | 28184    | 14818   |
| Result 2                                            | 78116            | 29241       | 16721   | 25379    | 13157   |
| Result 3                                            | 88228            | 33650       | 16313   | 28632    | 15097   |
| <b>Mean</b>                                         | 79302.0          | 31936.7     | 17563.7 | 27398.3  | 14357.3 |
| <b>STD</b>                                          | 6855.35          | 1929.34     | 1489.55 | 1439.55  | 856.37  |
| <b>%CV</b>                                          | 8.64             | 6.04        | 8.48    | 5.25     | 5.96    |
| Exp2                                                | Ctrl             | MPC         | M1      | M2       | M3      |
| Result 4                                            | 68294            | 35143       | 18834   | 29200    | 15528   |
| Result 5                                            | 62732            | 38706       | 20478   | 24647    | 19821   |
| Result 6                                            | 79906            | 37543       | 17969   | 27509    | 15088   |
| <b>Mean</b>                                         | 70310.7          | 37130.7     | 19093.7 | 27118.7  | 16812.3 |
| <b>STD</b>                                          | 7154.80          | 1483.52     | 1040.62 | 1879.13  | 2135.02 |
| <b>%CV</b>                                          | 10.18            | 4.00        | 5.45    | 6.93     | 12.70   |
| Exp3                                                | Ctrl             | MPC         | M1      | M2       | M3      |
| Resul 7                                             | 92259            | 25633       | 10833   | 29249    | 15633   |
| Resul 8                                             | 87591            | 27179       | 16154   | 29139    | 12913   |
| Resul 9                                             | 86069            | 24379       | 11280   | 29888    | 15331   |
| <b>Mean</b>                                         | 88639.7          | 25730.3     | 12755.7 | 29425.3  | 14625.7 |
| <b>STD</b>                                          | 2633.60          | 1145.17     | 2409.90 | 330.22   | 1217.30 |
| <b>%CV</b>                                          | 2.97             | 4.45        | 18.89   | 1.12     | 8.32    |
| Exp4                                                | Ctrl             | MPC         | M1      | M2       | M3      |
| Result 10                                           | 70747            | 21639       | 12157   | 23378    | 10574   |
| Result 11                                           | 90944            | 23066       | 10226   | 20172    | 21244   |
| Result 12                                           | 75513            | 35868       | 18828   | 18379    | 18609   |
| <b>Mean</b>                                         | 79068.0          | 26857.7     | 13737.0 | 20643.0  | 16809.0 |
| <b>STD</b>                                          | 8620.06          | 6397.85     | 3685.19 | 2067.83  | 4538.15 |
| <b>%CV</b>                                          | 10.90            | 23.82       | 26.83   | 10.02    | 27.00   |
| Exp5                                                | Ctrl             | MPC         | M1      | M2       | M3      |
| Result 13                                           | 71562            | 14818       | 19657   | 28447    | 27182   |
| Result 14                                           | 78116            | 13157       | 16721   | 26996    | 27771   |
| Result 15                                           | 88228            | 15097       | 16313   | 29984    | 27168   |
| <b>Mean</b>                                         | 79302.0          | 14357.3     | 17563.7 | 28475.7  | 27373.7 |
| <b>STD</b>                                          | 6855.35          | 856.37      | 1489.55 | 1220.01  | 281.02  |
| <b>%CV</b>                                          | 8.64             | 5.96        | 8.48    | 4.28     | 1.03    |
| Exp6                                                | Ctrl             | MPC         | M1      | M2       | M3      |
| Result 16                                           | 43333            | 10743       | 13134   | 42448    | 21271   |
| Result 17                                           | 45393            | 13475       | 12739   | 38427    | 22543   |
| Result 18                                           | 31172            | 11954       | 13370   | 30305    | 24957   |
| <b>Mean</b>                                         | 39966.0          | 12057.3     | 13081.0 | 37060.0  | 22923.7 |
| <b>STD</b>                                          | 6274.91          | 1117.73     | 260.32  | 5050.72  | 1528.69 |
| <b>%CV</b>                                          | 15.70            | 9.27        | 1.99    | 13.63    | 6.67    |
| Exp7                                                | Ctrl             | MPC         | M1      | M2       | M3      |
| Result 19                                           | 111788           | 16168       | 16825   | 40196    | 8527    |
| Result 20                                           | 109229           | 15730       | 16451   | 32368    | 22293   |
| Result 21                                           | 102118           | 14868       | 16809   | 35236    | 16367   |
| <b>Mean</b>                                         | 107711.7         | 15588.7     | 16695.0 | 35933.3  | 15729.0 |
| <b>STD</b>                                          | 4090.96          | 540.05      | 172.66  | 3233.58  | 5638.02 |
| <b>%CV</b>                                          | 3.80             | 3.46        | 1.03    | 9.00     | 35.84   |
| <b>Mean of all</b>                                  | 77757.1          | 23379.8     | 15784.2 | 29436.3  | 18375.8 |
| <b>STD of all</b>                                   | 33855.33         | 13533.57    | 7486.75 | 10493.76 | 7750.81 |
| <b>%CV of all</b>                                   | 43.54            | 57.89       | 47.43   | 35.65    | 42.18   |
|                                                     |                  |             |         |          |         |
|                                                     | <b>%CV intra</b> | <b>9.62</b> |         |          |         |
|                                                     | <b>%CV inter</b> | <b>8.69</b> |         |          |         |

MPC: maximal plasma concentration, CTRL: control> M1-3: coded drugs doses included in the drug combination

**Supplementary Table S6. Calculation of Intra- and Interplate deviations of cell metabolic activity of SW620 3D co-cultures with tumor:fibroblast % 50:50.**

| SW620 3D co-cultures metabolic activity (raw data) |                  |             |           |           |           |
|----------------------------------------------------|------------------|-------------|-----------|-----------|-----------|
| tumor:fibroblast 50:50                             |                  |             |           |           |           |
| <b>Exp1</b>                                        | <b>Ctrl</b>      | <b>MPC</b>  | <b>M1</b> | <b>M2</b> | <b>M3</b> |
| Result 1                                           | 71584            | 48007       | 36119     | 50895     | 28887     |
| Result 2                                           | 57301            | 51565       | 31387     | 51218     | 35966     |
| Result 3                                           | 71448            | 43846       | 35531     | 47784     | 36611     |
| <b>Mean</b>                                        | 66777.7          | 47806.0     | 34345.7   | 49965.7   | 33821.3   |
| <b>STD</b>                                         | 6701.25          | 3154.47     | 2105.82   | 1548.30   | 3499.02   |
| <b>%CV</b>                                         | 10.04            | 6.60        | 6.13      | 3.10      | 10.35     |
| <b>Exp2</b>                                        | <b>Ctrl</b>      | <b>MPC</b>  | <b>M1</b> | <b>M2</b> | <b>M3</b> |
| Result 4                                           | 75646            | 51820       | 26888     | 50537     | 37370     |
| Result 5                                           | 72034            | 40072       | 27224     | 50623     | 27985     |
| Result 6                                           | 69914            | 52443       | 27077     | 43690     | 40055     |
| <b>Mean</b>                                        | 72531.3          | 48111.7     | 27063.0   | 48283.3   | 35136.7   |
| <b>STD</b>                                         | 2366.36          | 5690.59     | 137.53    | 3248.17   | 5174.43   |
| <b>%CV</b>                                         | 3.26             | 11.83       | 0.51      | 6.73      | 14.73     |
| <b>Exp3</b>                                        | <b>Ctrl</b>      | <b>MPC</b>  | <b>M1</b> | <b>M2</b> | <b>M3</b> |
| Result 7                                           | 64573            | 28869       | 27741     | 42846     | 27661     |
| Result 8                                           | 58940            | 42309       | 20623     | 41837     | 20057     |
| Result 9                                           | 82636            | 31389       | 18857     | 40653     | 26930     |
| <b>Mean</b>                                        | 68716.3          | 34189.0     | 22407.0   | 41778.7   | 24882.7   |
| <b>STD</b>                                         | 10107.77         | 5833.15     | 3840.00   | 896.24    | 3425.29   |
| <b>%CV</b>                                         | 14.71            | 17.06       | 17.14     | 2.15      | 13.77     |
| <b>Exp4</b>                                        | <b>Ctrl</b>      | <b>MPC</b>  | <b>M1</b> | <b>M2</b> | <b>M3</b> |
| Result 10                                          | 76875            | 55144       | 40106     | 54938     | 40661     |
| Result 11                                          | 75987            | 52761       | 36137     | 51376     | 40364     |
| Result 12                                          | 73360            | 29248       | 21815     | 51469     | 36041     |
| <b>Mean</b>                                        | 75407.3          | 45717.7     | 32686.0   | 52594.3   | 39022.0   |
| <b>STD</b>                                         | 1492.38          | 11686.38    | 7855.88   | 1657.66   | 2111.37   |
| <b>%CV</b>                                         | 1.98             | 25.56       | 24.03     | 3.15      | 5.41      |
| <b>Exp5</b>                                        | <b>Ctrl</b>      | <b>MPC</b>  | <b>M1</b> | <b>M2</b> | <b>M3</b> |
| Result 13                                          | 71584            | 28887       | 56240     | 40578     | 45057     |
| Result 14                                          | 57301            | 35966       | 52511     | 40009     | 50783     |
| Result 15                                          | 71448            | 36611       | 56446     | 39877     | 47667     |
| <b>Mean</b>                                        | 66777.7          | 33821.3     | 55065.7   | 40154.7   | 47835.7   |
| <b>STD</b>                                         | 6701.25          | 3499.02     | 1808.38   | 304.15    | 2340.67   |
| <b>%CV</b>                                         | 10.04            | 10.35       | 3.28      | 0.76      | 4.89      |
| <b>Exp6</b>                                        | <b>Ctrl</b>      | <b>MPC</b>  | <b>M1</b> | <b>M2</b> | <b>M3</b> |
| Result 16                                          | 64894            | 36559       | 52045     | 44501     | 35835     |
| Result 17                                          | 65043.5          | 24512       | 51588     | 46592     | 48710     |
| Result 18                                          | 65193            | 31608       | 45258     | 45359     | 48605     |
| <b>Mean</b>                                        | 65043.5          | 30893.0     | 49630.3   | 45484.0   | 44383.3   |
| <b>STD</b>                                         | 122.07           | 4944.09     | 3097.33   | 858.21    | 6044.74   |
| <b>%CV</b>                                         | 0.19             | 16.00       | 6.24      | 1.89      | 13.62     |
| <b>Exp7</b>                                        | <b>Ctrl</b>      | <b>MPC</b>  | <b>M1</b> | <b>M2</b> | <b>M3</b> |
| Result 19                                          | 113259           | 36714       | 59128     | 43165     | 23558     |
| Result 20                                          | 129998           | 34123       | 59246     | 44662     | 35700     |
| Result 21                                          | 134262           | 33567       | 52786     | 35148     | 34005     |
| <b>Mean</b>                                        | 125839.7         | 34801.3     | 57053.3   | 40991.7   | 31087.7   |
| <b>STD</b>                                         | 9064.59          | 1371.38     | 3017.84   | 4177.05   | 5369.06   |
| <b>%CV</b>                                         | 7.20             | 3.94        | 5.29      | 10.19     | 17.27     |
| <b>Mean of all</b>                                 | 77299.1          | 39334.3     | 39750.1   | 45607.5   | 36595.6   |
| <b>STD of all</b>                                  | 29802.63         | 18387.12    | 17001.07  | 20321.82  | 15125.71  |
| <b>%CV of all</b>                                  | 38.55            | 46.75       | 42.77     | 44.56     | 41.33     |
|                                                    | <b>%CV intra</b> | <b>8.84</b> |           |           |           |
|                                                    | <b>%CV inter</b> | <b>6.70</b> |           |           |           |

MPC: maximal plasma concentration, CTRL: control> M1-3: coded drugs doses included in the drug combination

**Supplementary Table S7. Calculation of Intra- and Interplate deviations of cell metabolic activity of DLD1 3D co-cultures with tumor:fibroblast % 50:50.**

| DLD1 3D co-cultures metabolic activity (raw data) |                  |             |         |         |         |
|---------------------------------------------------|------------------|-------------|---------|---------|---------|
| tumor:fibroblast 50:50                            |                  |             |         |         |         |
| Exp1                                              | Ctrl             | MPC         | M1      | M2      | M3      |
| Result 1                                          | 43954            | 12262       | 21244   | 22975   | 13491   |
| Result 2                                          | 42079            | 11455       | 20783   | 17310   | 14942   |
| Result 3                                          | 52896            | 14341       | 21333   | 17783   | 15232   |
| <b>Mean</b>                                       | 46309.7          | 12686.0     | 21120.0 | 19356.0 | 14555.0 |
| <b>STD</b>                                        | 4719.73          | 1215.75     | 241.05  | 2566.29 | 761.62  |
| <b>%CV</b>                                        | 10.19            | 9.58        | 1.14    | 13.26   | 5.23    |
| Exp2                                              | Ctrl             | MPC         | M1      | M2      | M3      |
| Result 4                                          | 56814            | 22862       | 26706   | 24210   | 22518   |
| Result 5                                          | 55676            | 23185       | 26338   | 26185   | 13121   |
| Result 6                                          | 52681            | 23229       | 31491   | 21015   | 20074   |
| <b>Mean</b>                                       | 55057.0          | 23092.0     | 28178.3 | 23803.3 | 18571.0 |
| <b>STD</b>                                        | 1743.14          | 163.62      | 2347.22 | 2130.14 | 3980.80 |
| <b>%CV</b>                                        | 3.17             | 0.71        | 8.33    | 8.95    | 21.44   |
| Exp3                                              | Ctrl             | MPC         | M1      | M2      | M3      |
| Resul 7                                           | 49190            | 13626       | 19933   | 14470   | 12245   |
| Resul 8                                           | 37287            | 14133       | 19483   | 16410   | 12009   |
| Resul 9                                           | 31019            | 15012       | 16926   | 15605   | -       |
| <b>Mean</b>                                       | 39165.3          | 14257.0     | 18780.7 | 15495.0 | 12127.0 |
| <b>STD</b>                                        | 7536.24          | 572.59      | 1324.25 | 795.81  | 118.00  |
| <b>%CV</b>                                        | 19.24            | 4.02        | 7.05    | 5.14    | 0.97    |
| Exp4                                              | Ctrl             | MPC         | M1      | M2      | M3      |
| Result 10                                         | 42628            | 17496       | 19145   | 17757   | 17348   |
| Result 11                                         | 53709            | 19050       | 24006   | 21817   | 21725   |
| Result 12                                         | 51255            | 20484       | 19976   | 23602   | 25014   |
| <b>Mean</b>                                       | 49197.3          | 19010.0     | 21042.3 | 21058.7 | 21362.3 |
| <b>STD</b>                                        | 4752.03          | 1220.17     | 2122.91 | 2445.72 | 3140.12 |
| <b>%CV</b>                                        | 9.66             | 6.42        | 10.09   | 11.61   | 14.70   |
| Exp5                                              | Ctrl             | MPC         | M1      | M2      | M3      |
| Result 13                                         | 36487            | 16076       | 25585   | 25228   | 26097   |
| Result 14                                         | 35983            | 16763       | 26978   | 19732   | 24418   |
| Result 15                                         | 45908            | 16706       | 27625   | 18265.0 | 22590.0 |
| <b>Mean</b>                                       | 39459.3          | 16515.0     | 26729.3 | 21075.0 | 24368.3 |
| <b>STD</b>                                        | 4564.54          | 311.29      | 851.19  | 2997.06 | 1432.16 |
| <b>%CV</b>                                        | 11.57            | 1.88        | 3.18    | 14.22   | 5.88    |
| Exp6                                              | Ctrl             | MPC         | M1      | M2      | M3      |
| Result 16                                         | 53808            | 6042        | 17673   | 20284   | 29014   |
| Result 17                                         | 53620            | 7899        | 14691   | 15075   | 29963   |
| Result 18                                         | 60135            | 8574        | 17528   | 21483   | 28547   |
| <b>Mean</b>                                       | 55854.3          | 7505.0      | 16630.7 | 18947.3 | 29174.7 |
| <b>STD</b>                                        | 3027.86          | 1070.57     | 1372.83 | 2781.56 | 589.14  |
| <b>%CV</b>                                        | 5.42             | 14.26       | 8.25    | 14.68   | 2.02    |
| Exp7                                              |                  |             |         |         |         |
| Result 19                                         |                  |             |         |         |         |
| Result 20                                         |                  |             |         |         |         |
| Result 21                                         |                  |             |         |         |         |
| <b>Mean</b>                                       |                  |             |         |         |         |
| <b>STD</b>                                        |                  |             |         |         |         |
| <b>%CV</b>                                        |                  |             |         |         |         |
| <b>Mean of all</b>                                | 47507.2          | 15510.8     | 22080.2 | 19955.9 | 20026.4 |
| <b>STD of all</b>                                 | 16876.74         | 6854.43     | 8771.96 | 6939.42 | 7710.49 |
| <b>%CV of all</b>                                 | 35.52            | 44.19       | 39.73   | 34.77   | 38.50   |
|                                                   | <b>%CV intra</b> | <b>8.41</b> |         |         |         |
|                                                   | <b>%CV inter</b> | <b>9.87</b> |         |         |         |

MPC: maximal plasma concentration, CTRL: control> M1-3: coded drugs doses included in the drug combination

**Supplementary Table S8. Calculation of Intra- and Interplate deviations of cell metabolic activity of HCT116 3D co-cultures with tumor:fibroblast % 30:70 and 70:30.**

| HCT116 3D co-cultures cell metabolic activity (raw data) |              |         |         |         |         |                        |             |         |         |         |         |
|----------------------------------------------------------|--------------|---------|---------|---------|---------|------------------------|-------------|---------|---------|---------|---------|
| tumor:fibroblast 30:70                                   |              |         |         |         |         | tumor:fibroblast 70:30 |             |         |         |         |         |
| Exp1                                                     | Ctrl         | MPC     | M1      | M2      | M3      | Exp1                   | Ctrl        | MPC     | M1      | M2      | M3      |
| Result 1                                                 | 14692        | 4029    | 11983   | 11385   | 12448   | Result 1               | 45682       | 7164    | 24870   | 19181   | 32820   |
| Result 2                                                 | 16204        | 3966    | 11599   | 11426   | 16889   | Result 2               | 38533       | 7402    | 23572   | 16220   | 37978   |
| Result 3                                                 | 18188        | 4020    | 11483   | 9963    | 12688   | Result 3               | 33504       | 8380    | 23851   | 19907   | 33112   |
| <b>Mean</b>                                              | 16361.3      | 4005.0  | 11688.3 | 10924.7 | 14008.3 | <b>Mean</b>            | 39239.7     | 7648.7  | 24097.7 | 18436.0 | 34636.7 |
| <b>STD</b>                                               | 1431.57      | 27.82   | 213.67  | 680.21  | 2039.29 | <b>STD</b>             | 4996.70     | 526.18  | 557.87  | 1594.73 | 2365.68 |
| <b>%CV</b>                                               | 8.75         | 0.69    | 1.83    | 6.23    | 14.56   | <b>%CV</b>             | 12.73       | 6.88    | 2.32    | 8.65    | 6.83    |
| Exp2                                                     | Ctrl         | MPC     | M1      | M2      | M3      | Exp2                   | Ctrl        | MPC     | M1      | M2      | M3      |
| Result 4                                                 | 36966        | 5141    | 17500   | 13425   |         | Result 4               | 52942       | 7733    | 25179   | 18419   | 34989   |
| Result 5                                                 | 48808        | 5740    | 23237   | 14296   | 32094   | Result 5               | 54944       | 9765    | 36233   | 15675   | 36447   |
| Result 6                                                 | 49843        | 7640    | 28453   | 15390   | 38564   | Result 6               | 44599       | 9711    | 31565   | 18942   | 41601   |
| <b>Mean</b>                                              | 45205.7      | 6173.7  | 23063.3 | 14370.3 | 35329.0 | <b>Mean</b>            | 50828.3     | 9069.7  | 30992.3 | 17678.7 | 37679.0 |
| <b>STD</b>                                               | 5841.63      | 1065.30 | 4473.23 | 803.93  | 3235.00 | <b>STD</b>             | 4479.99     | 945.42  | 4530.91 | 1432.80 | 2836.43 |
| <b>%CV</b>                                               | 12.92        | 17.26   | 19.40   | 5.59    | 9.16    | <b>%CV</b>             | 8.81        | 10.42   | 14.62   | 8.10    | 7.53    |
| Exp3                                                     | Ctrl         | MPC     | M1      | M2      | M3      | Exp3                   | Ctrl        | MPC     | M1      | M2      | M3      |
| Result 7                                                 | 23303        | 4324    | 15146   | 15833   | 24807   | Result 7               | 43996       | 9387    | 22825   | 18493   | 31639   |
| Result 8                                                 | 25140        | 5357    | 13285   | 13364   | 19992   | Result 8               | 43538       | 11976   | 29870   | 23719   | 32574   |
| Result 9                                                 | 24827        | 4302    | 15057   | 15677   | 23897   | Result 9               | 40966       | 8305    | 25716   | 22632   | 36086   |
| <b>Mean</b>                                              | 24423.3      | 4661.0  | 14496.0 | 14958.0 | 22898.7 | <b>Mean</b>            | 42833.3     | 9889.3  | 26137.0 | 21614.7 | 33433.0 |
| <b>STD</b>                                               | 802.43       | 492.23  | 857.08  | 1128.93 | 2088.63 | <b>STD</b>             | 1333.58     | 1540.20 | 2891.47 | 2251.52 | 1914.40 |
| <b>%CV</b>                                               | 3.29         | 10.56   | 5.91    | 7.55    | 9.12    | <b>%CV</b>             | 3.11        | 15.57   | 11.06   | 10.42   | 5.73    |
| Exp4                                                     | Ctrl         | MPC     | M1      | M2      | M3      | Exp4                   | Ctrl        | MPC     | M1      | M2      | M3      |
| Result 10                                                | 23237        | 4484    | 8827    | 12411   | 19764   | Result 10              | 44667       | 7273    | 18075   | 16850   | 26658   |
| Result 11                                                | 30514        | 4359    | 8718    | 11681   | 16527   | Result 11              | 49893       | 7880    | 21840   | 19240   | 33323   |
| Result 12                                                | 16429        | 3900    | 10711   | 13320   | 19141   | Result 12              | 40931       | 7513    | 17391   | 16759   | 26513   |
| <b>Mean</b>                                              | 23393.3      | 4247.7  | 9418.7  | 12470.7 | 18477.3 | <b>Mean</b>            | 45163.7     | 7555.3  | 19102.0 | 17616.3 | 28831.3 |
| <b>STD</b>                                               | 5751.24      | 251.08  | 914.90  | 670.45  | 1402.35 | <b>STD</b>             | 3675.54     | 249.61  | 1956.09 | 1148.71 | 3176.64 |
| <b>%CV</b>                                               | 24.58        | 5.91    | 9.71    | 5.38    | 7.59    | <b>%CV</b>             | 8.14        | 3.30    | 10.24   | 6.52    | 11.02   |
| <b>CV intra</b>                                          | <b>9.30</b>  |         |         |         |         | <b>%CV intra</b>       | <b>8.60</b> |         |         |         |         |
| <b>CV inter</b>                                          | <b>12.39</b> |         |         |         |         | <b>%CV inter</b>       | <b>8.20</b> |         |         |         |         |

MPC: maximal plasma concentration, CTRL: control> M1-3: coded drugs doses included in the drug combination

**Supplementary Table S9. Calculation of Intra- and Interplate deviations of spheroid size on day 2 of HCT116, SW620 and DLD1 3D co-cultures with tumor:fibroblast % 50:50.**

|             | 6 3D co-cultures growth kinetics day 2 (raw data) |              |       |       |       | D 3D co-cultures growth kinetics day 2 (raw data) |                    |              |       |       | 3D co-cultures growth kinetics day 2 (raw data) |       |                    |              |       |  |  |
|-------------|---------------------------------------------------|--------------|-------|-------|-------|---------------------------------------------------|--------------------|--------------|-------|-------|-------------------------------------------------|-------|--------------------|--------------|-------|--|--|
|             | tumor:fibroblast 50:50                            |              |       |       |       | tumor:fibroblast 50:50                            |                    |              |       |       | tumor:fibroblast 50:50                          |       |                    |              |       |  |  |
| Exp1        | size measurments/spheroid/well                    |              |       |       |       | size measurments/spheroid/well                    |                    |              |       |       | size measurments/spheroid/well                  |       |                    |              |       |  |  |
|             | 315.9                                             | 304.6        | 317.6 | 304.3 | 287.2 | 310.4                                             | 290.1              | 300.8        | 379.7 | 361.5 | 306.8                                           | 329.7 | 291.9              | 319.2        | 322.1 |  |  |
|             | 306.1                                             | 342.9        | 316.5 | 322.5 | 331.8 | 248.5                                             | 319.7              | 282.4        | 298.8 | 318.5 | 320.5                                           | 312.1 | 327.7              | 329.7        | 319.6 |  |  |
|             | 305.3                                             | 301.2        | 342.2 | 333.7 | 307.7 | 340.6                                             | 320.6              | 288          | 331.7 | 299.1 | -                                               | 306.2 | 307                | 310.1        | 296.1 |  |  |
|             | 332.1                                             | 342.3        | 387.1 | 300.1 | 330.2 | 364.6                                             | 350                | 327.5        | -     | 324.9 | 323.5                                           | 302.9 | 303.8              | 311.9        | 324.9 |  |  |
| <b>Mean</b> | 321.6                                             |              |       |       |       | 318.8                                             |                    |              |       |       | 314.0                                           |       |                    |              |       |  |  |
| <b>STD</b>  | 21.74                                             |              |       |       |       | 31.27                                             |                    |              |       |       | 10.95                                           |       |                    |              |       |  |  |
| <b>%CV</b>  | 6.76                                              |              |       |       |       | 9.81                                              |                    |              |       |       | 3.49                                            |       |                    |              |       |  |  |
| Exp2        | size measurments/spheroid/well                    |              |       |       |       | size measurments/spheroid/well                    |                    |              |       |       | size measurments/spheroid/well                  |       |                    |              |       |  |  |
|             | 321.3                                             | 333.4        | 318.1 | 349.1 | 328.8 | 351.7                                             | 333.8              | 338.4        | 341.8 | -     | 237                                             | -     | 229.7              | 252.1        | 248.3 |  |  |
|             | 313.2                                             | 335.3        | -     | 311.4 | 373.1 | 369.4                                             | 277.5              | 323.6        | 377.2 | 386.4 | 248.6                                           | 241.3 | 240.4              | 239.5        | 239.4 |  |  |
|             | 315.9                                             | 346.1        | 308.2 | 343.2 | 335.5 | 374.1                                             | 370                | 365.3        | 328.8 | 327.1 | 245.8                                           | 225.5 | 236.7              | 261.8        | 250.3 |  |  |
|             | 313.8                                             | 311.4        | 316.3 | 320   | 316.5 | 368.3                                             | 368.3              | 361.1        | 362.1 | 355.5 | 247.7                                           | 237.7 | 232.5              | 239          | 244.4 |  |  |
| <b>Mean</b> | 326.9                                             |              |       |       |       | 351.6                                             |                    |              |       |       | 242.0                                           |       |                    |              |       |  |  |
| <b>STD</b>  | 16.45                                             |              |       |       |       | 25.10                                             |                    |              |       |       | 8.30                                            |       |                    |              |       |  |  |
| <b>%CV</b>  | 5.03                                              |              |       |       |       | 7.14                                              |                    |              |       |       | 3.43                                            |       |                    |              |       |  |  |
| Exp3        | size measurments/spheroid/well                    |              |       |       |       | size measurments/spheroid/well                    |                    |              |       |       | size measurments/spheroid/well                  |       |                    |              |       |  |  |
|             | 335.9                                             | 377.9        | 347.2 | 347.9 | 337.1 | 244.3                                             | 272.6              | 265.6        | 287.6 | 278.4 | 366.4                                           | 344.7 | 302.4              | 305          | 290.9 |  |  |
|             | 344.7                                             | 393.3        | 357.3 | 346.3 | 379   | 264                                               | 277.1              | 253.6        | 278.3 | 267.3 | 335.3                                           | 338.3 | 298.6              | 312.4        | 299.8 |  |  |
|             | 351.4                                             | 336          | 357.8 | 356.1 | 351.7 | 238.7                                             | 268.9              | 269.5        | 314.1 | 259.4 | 309.9                                           | 260.8 | 317                | 262          | 312.5 |  |  |
|             | 328.6                                             | 373.8        | 348.6 | 390.4 | 331.6 | 266.1                                             | 274.3              | 283.8        | 305.7 | 277.7 | 305.2                                           | 304.3 | 328.5              | 308          | 345   |  |  |
| <b>Mean</b> | 354.6                                             |              |       |       |       | 272.4                                             |                    |              |       |       | 312.4                                           |       |                    |              |       |  |  |
| <b>STD</b>  | 18.49                                             |              |       |       |       | 17.30                                             |                    |              |       |       | 25.31                                           |       |                    |              |       |  |  |
| <b>%CV</b>  | 5.21                                              |              |       |       |       | 6.35                                              |                    |              |       |       | 8.10                                            |       |                    |              |       |  |  |
|             | <b>Mean of all</b>                                | <b>334.5</b> |       |       |       |                                                   | <b>Mean of all</b> | <b>313.5</b> |       |       |                                                 |       | <b>Mean of all</b> | <b>289.8</b> |       |  |  |
|             | <b>STD of all</b>                                 | <b>24.00</b> |       |       |       |                                                   | <b>STD of all</b>  | <b>41.21</b> |       |       |                                                 |       | <b>STD of all</b>  | <b>37.40</b> |       |  |  |
|             | <b>%CV of all</b>                                 | <b>7.18</b>  |       |       |       |                                                   | <b>%CV of all</b>  | <b>13.15</b> |       |       |                                                 |       | <b>%CV of all</b>  | <b>12.90</b> |       |  |  |

**Supplementary Table S10. Calculation of Intra- and Interplate deviations of spheroid size on day 5 of HCT116 and SW620 3D co-cultures with tumor:fibroblast % 50:50.**

|             | H116 3D co-cultures growth kinetics day 5 (raw) |             |        |        |        | H620 3D co-cultures growth kinetics day 5 (raw) |             |        |        |        |
|-------------|-------------------------------------------------|-------------|--------|--------|--------|-------------------------------------------------|-------------|--------|--------|--------|
|             | tumor:fibroblast 50:50                          |             |        |        |        | tumor:fibroblast 50:50                          |             |        |        |        |
| Exp1        | Ctrl                                            | MPC         | M1     | M2     | M3     | Ctrl                                            | MPC         | M1     | M2     | M3     |
| Result 1    | 634.9                                           | 436.3       | 568.2  | 631    | 523.1  | 449.1                                           | 369         | 456.4  | 489.8  | 476.9  |
| Result 2    | 550.3                                           | 434.6       | 506.3  | 643.6  | 577.6  | 444.4                                           | 366.3       | 445.3  | 460.1  | 431.6  |
| Result 3    | 556.5                                           | 404         | 532.1  | 577.4  | 556    | 441                                             | 368.4       | 432.6  | 434.5  | 448.1  |
| <b>Mean</b> | 580.57                                          | 424.97      | 535.53 | 617.33 | 552.23 | 444.83                                          | 367.90      | 444.77 | 461.47 | 452.20 |
| <b>STD</b>  | 38.50                                           | 14.84       | 25.39  | 28.70  | 22.41  | 3.32                                            | 1.16        | 9.72   | 22.60  | 18.72  |
| <b>%CV</b>  | 6.63                                            | 3.49        | 4.74   | 4.65   | 4.06   | 0.75                                            | 0.31        | 2.19   | 4.90   | 4.14   |
| Exp2        |                                                 |             |        |        |        |                                                 |             |        |        |        |
| Result 4    | 603.4                                           | 368         | 502.9  | 573.6  | 575.8  | 425.3                                           | 419.7       | 410    | 428.6  | 387.3  |
| Result 5    | 581.8                                           | 393.6       | 482.9  | 580.9  | 533.7  | 441.6                                           | 353.4       | 393.1  | 422.2  | 402.9  |
| Result 6    | 601.5                                           | 395.5       | 506.2  | 544.4  | 558.6  | 425.8                                           | 362.2       | 399.3  | 409    | 446.6  |
| <b>Mean</b> | 595.57                                          | 385.70      | 497.33 | 566.30 | 556.03 | 430.90                                          | 378.43      | 400.80 | 419.93 | 412.27 |
| <b>STD</b>  | 9.77                                            | 12.54       | 10.29  | 15.77  | 17.28  | 7.57                                            | 29.40       | 6.98   | 8.16   | 25.10  |
| <b>%CV</b>  | 1.64                                            | 3.25        | 2.07   | 2.78   | 3.11   | 1.76                                            | 7.77        | 1.74   | 1.94   | 6.09   |
| Exp3        |                                                 |             |        |        |        |                                                 |             |        |        |        |
| Resul 7     | 588.7                                           | 403.6       | 458.3  | 530.4  | 523.5  | -                                               | 373.9       | 435.7  | -      | 443.9  |
| Resul 8     | 584.2                                           | 374.4       | 421.5  | 545.6  | 517.5  | 512.6                                           | 358.5       | 425.1  | 465.5  | 457.1  |
| Resul 9     | 551.8                                           | 336         | 475.3  | 548.3  | 539.4  | 474.6                                           | 356.5       | 433.6  | 480.1  | 458.7  |
| <b>Mean</b> | 574.90                                          | 371.33      | 451.70 | 541.43 | 526.80 | 493.60                                          | 362.97      | 431.47 | 472.80 | 453.23 |
| <b>STD</b>  | 16.44                                           | 27.68       | 22.45  | 7.88   | 9.24   | 19.00                                           | 7.77        | 4.58   | 7.30   | 6.63   |
| <b>%CV</b>  | 2.86                                            | 7.45        | 4.97   | 1.46   | 1.75   | 3.85                                            | 2.14        | 1.06   | 1.54   | 1.46   |
|             | <b>CV% intra</b>                                | <b>3.66</b> |        |        |        | <b>CV% intra</b>                                | <b>2.78</b> |        |        |        |
|             | <b>CV% inter</b>                                | <b>9.22</b> |        |        |        | <b>CV% inter</b>                                | <b>3.79</b> |        |        |        |

## Supplementary Movies

### Supplementary Movie S1. Kinetic movie of HCT116 3D co-culture spheroid formation

Representative movie of a HCT116 3D co-culture seeded at 1000 cells/well recorded for 24 hours. Culture consists of tumor cells (blue), CCD18co healthy colon fibroblasts (green) in ratio 1:1 and 5% endothelial ECRF24 cells (red). A discontinuous kinetic procedure with imaging every 30 minutes was performed for 24 hours. The movies are presented with 10 images/second.

Scalebar represents 200  $\mu$ m.

### Supplementary Movie S2. Kinetic movie of SW620 3D co-culture spheroid formation

Representative movie of a SW620 3D co-culture seeded at 1000 cells/well recorded for 24 hours. Culture consists of tumor cells (blue), CCD18co healthy colon fibroblasts (green) in ratio 1:1 and 5% endothelial ECRF24 cells (red). A discontinuous kinetic procedure with imaging every 30 minutes was performed for 24 hours. The movies are presented with 10 images/second. Scalebar represents 200  $\mu$ m.

### Supplementary Movie S3. Kinetic movie of DLD1 3D co-culture spheroid formation



Representative movie of a DLD1 3D co-culture seeded at 1000 cells/well recorded for 24 hours. Culture consists of tumor cells (blue), CCD18co healthy colon fibroblasts (green) in ratio 1:1 and 5% endothelial ECRF24 cells (red). A discontinuous kinetic procedure with imaging every 30 minutes was performed for 24 hours. The movies are presented with 10 images/second. Scalebar represents 200  $\mu\text{m}$ .
